# Supplementary material
Source: PubMed Central journal article supplement (PMC4433408)
Supplement: NIHMS674132-supplement.pdf [file NIHMS674132-supplement.pdf]

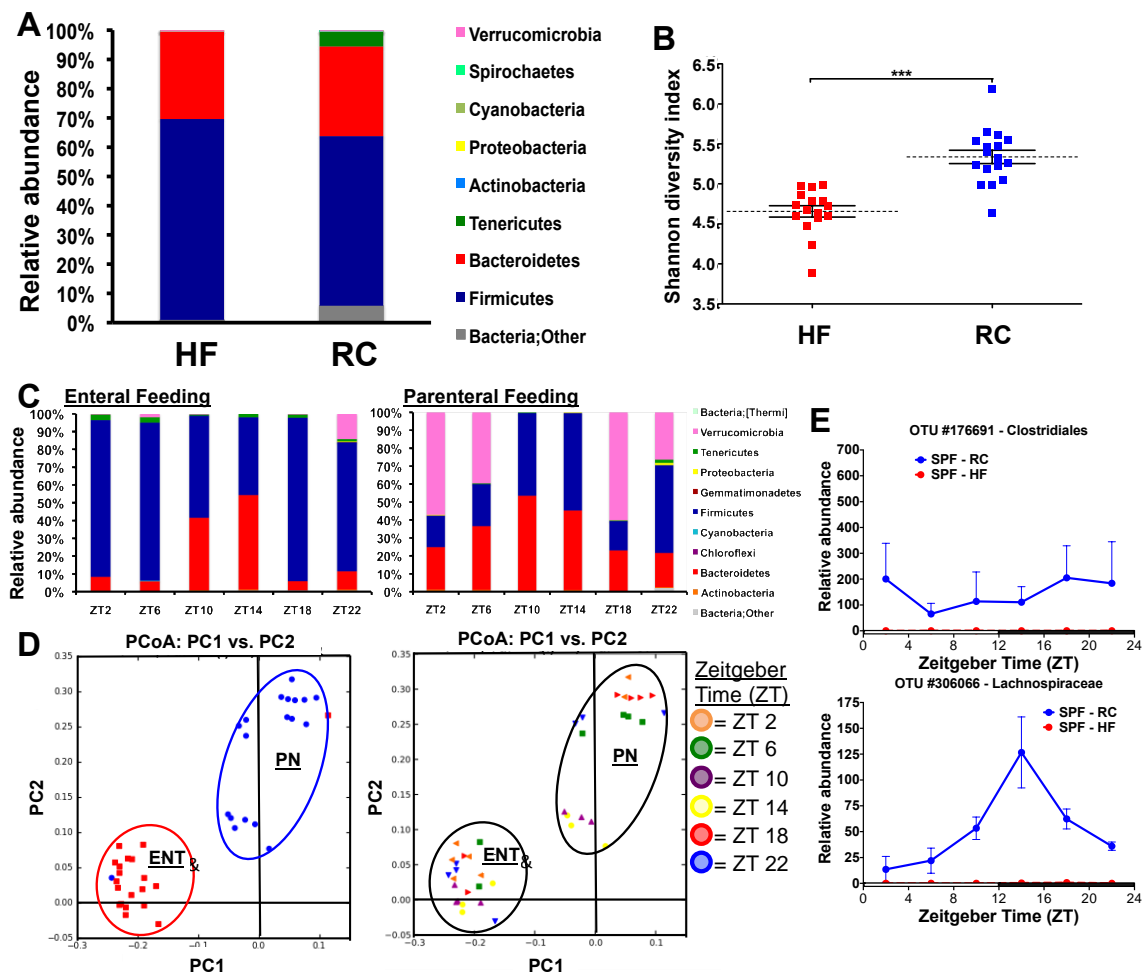

**Figure S2. Gut microbiota structural profile is altered by high fat diet yet gut microbes from parenterally-fed (PN) mice still demonstrate diurnal variation despite altered community structure, related to Figure 2. (A-B)** Cecal samples from SPF C57Bl/6 male mice fed HF or RC diet over 5 weeks were collected over 24 hours ( $n=2$  to 3 mice/ZT time point and subjected to 16S amplicon sequencing via Miseq **(A)**, Distribution of bacterial phyla between HF and RC-fed mice. Shannon diversity indices **(B)** are shown for individual mice and represented as means  $\pm$  s.e.m. \*\*\* $p<0.001$  determined via unpaired t-test. Additionally, cecal samples were collected from age-matched male SPF C57Bl/6 male mice fed via enteral feeding (ENT) or via intravenous infusion with parenteral nutrition (PN) for 72 hours and harvested every four hours over a 24-hour period ( $n=2$  to 5 mice/Zeitgeber (ZT) time point). Cecal DNA subjected to 16S rRNA amplicon sequencing via Illumina Miseq **(C)**, Average relative abundance of bacterial phyla between ENT and PN at each ZT time point. Multi Response Permutation Procedure (MRPP) analysis showed that both ENT and PN showed significant clustering by ZT time (ENT delta value = 0.0004; PN delta value = 0.0002) **(D)**, Principal Coordinate Analysis (PCoA) plot of the weighted UniFrac distances colored by dietary treatment and by ZT time point (PC, principle coordinate). Analysis of similarity (ANOSIM) of both weighted and unweighted  $\beta$ -diversity showed significant differences ( $p=0.001$ ) in community structure induced by dietary delivery strategy. Multivariate analysis showed that ZT time point was a significant factor for both ENT (ADONIS  $R^2 = 0.2824$ ,  $p=0.001$ ) and PN (ADONIS  $R^2 = 0.3164$ ,  $p=0.001$ ). Fecal OTUs **(E)** from RC-fed animals that also exhibit significant rhythmicity (as determined by empirical JTK\_CYCLE) in cecal contents (see Figure 2F for cecal data). Data represents mean  $\pm$  s.e.m. Fecal eJTK\_CYCLE empirical p-values: OTU #176691 = 0.057; OTU #306066 = 0.073.

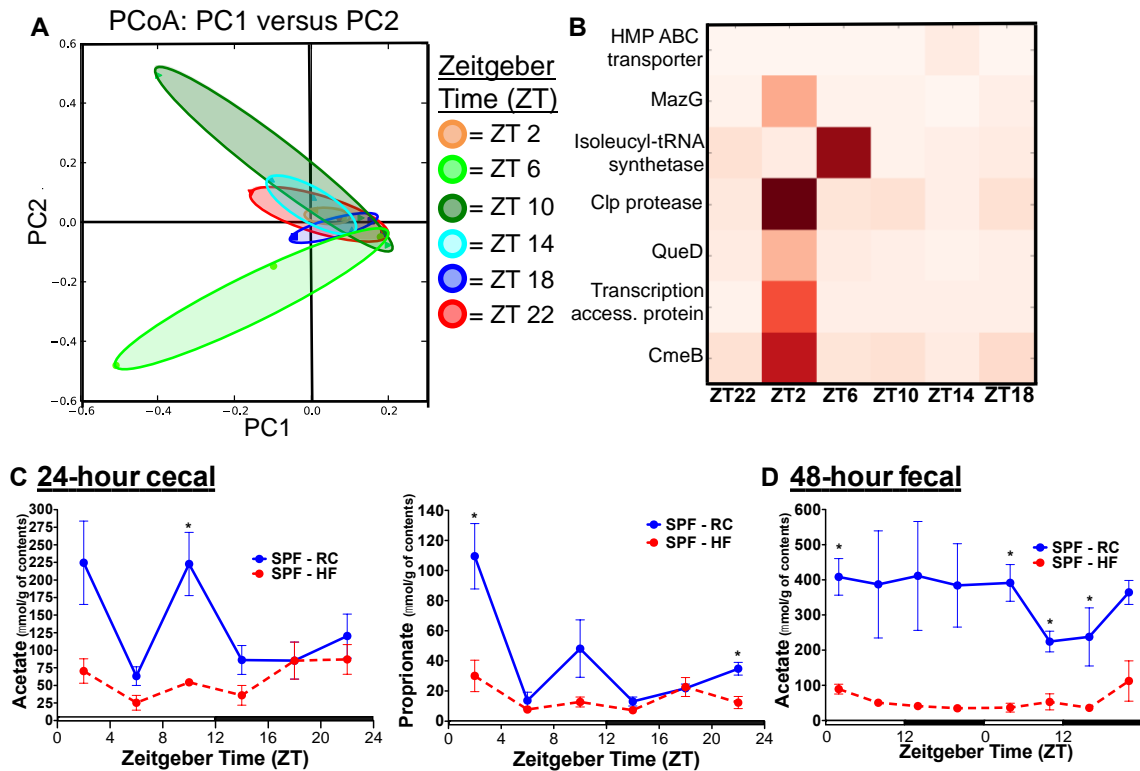

**Figure S3. Metagenomic analysis of cecal contents from RC-fed mice reveals no significant change in annotated genes across Zeitgeber time, yet diurnal oscillations in SCFA production are detectable, related to Figure 3.** Cecal samples from age-matched male SPF C57Bl/6 male mice fed RC diet for 5 weeks and subjected to shotgun metagenomic sequencing. Abundance tables of SEED annotations were normalized to equivalent sampling depth across samples and the Principal Coordinate Analysis (PCoA) plot (**A**) was generated using QIIME. The PCoA plot is colored by ZT time point (PC = principle coordinate). Heatmap of individual microbial genes (**B**) exhibiting significant diurnal patterns across ZT from metagenomic analysis. Diurnal acetate and propionate concentration measured by GC-MS-MS from cecal contents (**C**) collected over 24 hours or fecal pellets (**D**) collected over 48 hours from mice fed RC and HF for 5 weeks at time of harvest (cecal) or by repeated sampling every 6 hours over 48 hours (fecal) from individual mice (expressed as  $\mu\text{mol/g}$  of content) ( $n=2$  to 3 mice/Zeitgeber (ZT) time point). Data represent mean  $\pm$  s.e.m. \* $p < 0.05$  determined via unpaired t-test at each time point. See Table S6 for CircWave rhythmicity analyses of SCFAs.

**Supplemental Tables:**

**Table S1. Dietary composition, Related to Figure 1, Figure 2, and Figure 3**

| <b>Study Diets</b>           | <b><sup>a</sup>Regular Chow (RC)</b> | <b><sup>b</sup>18% Saturated milk fat (HF)</b> |
|------------------------------|--------------------------------------|------------------------------------------------|
| <b>Fat (% kcal)</b>          | <b>18</b>                            | <b>37.4</b>                                    |
| Saturated                    | 2.6                                  | 24.3                                           |
| -C16:0 Palmitic              | 2.0                                  | 9.7                                            |
| -C18:0 Stearic               | 0.6                                  | 4.67                                           |
| -C14:0 Myristic              | 0                                    | 4.4                                            |
| -Other                       | 0                                    | 5.5                                            |
| Monounsaturated              | 3.5                                  | 11.9                                           |
| -C18.1 Oleic                 | 3.5                                  | 10.5                                           |
| -Other                       | 0                                    | 1.4                                            |
| Polyunsaturated              | 9.9                                  | 1.3                                            |
| -C18.2 Linoleic              | 0                                    | 1.1                                            |
| -C18.3 Linolenic             | 0.9                                  | 0.2                                            |
| <b>Protein (% kcal)</b>      | <b>24</b>                            | <b>16</b>                                      |
| <b>Carbohydrate (% kcal)</b> | <b>58</b>                            | <b>47</b>                                      |
| Starch                       | 58                                   | 11.8                                           |
| Sucrose                      | 0                                    | 23.2                                           |
| Maltodextrin                 | 0                                    | 11.8                                           |
| <b>Fiber (g/kg)</b>          | <b>147</b>                           | <b>45</b>                                      |

<sup>a</sup>Regular chow (RC), 2018S Harlan Teklad Global 18% Protein Rodent Diet. Ingredients in order of inclusion: Ground wheat, ground corn, wheat middlings, dehulled soybean meal, corn gluten meal, soybean oil, calcium carbonate, dicalcium phosphate, brewers dried yeast, iodized salt, L- lysine, DL-methionine, choline chloride, kaolin, magnesium oxide, vitamin E acetate, menadione sodium bisulfite complex (source of vitamin K activity), manganous oxide, ferrous sulfate, zinc oxide, niacin, calcium pantothenate, copper sulfate, pyridoxine hydrochloride, riboflavin, thiamin mononitrate, vitamin A acetate, calcium iodate, vitamin B12 supplement, folic acid, biotin, vitamin D3 supplement, cobalt carbonate.

<sup>b</sup>18% Saturated milk fat (HF), Harlan-Teklad TD.97222 customized diet. Ingredients include (g/kg): Casein (195), DL-Methionine (3), Sucrose (254.924), Corn starch (130), Maltodextrin (140), Anhydrous milkfat (180), cholesterol (2.04), cellulose (45), mineral mix, AIN-76 (35), calcium carbonate (4), vitamin mix Teklad (10), choline bitartrate (1), Ethoxyquin, antioxidant (0.036).

**Table S2. Mediobasal hypothalamus (MBH) and liver CircWave cosinor statistical output, related to Figure 1**

|       | Housing | Diet | Gene target  | F-statistic (1 sinewave) | P-value | R^2    | F-statistic (sinewave + 1 harmonic) | P-value | R^2   |
|-------|---------|------|--------------|--------------------------|---------|--------|-------------------------------------|---------|-------|
| MBH   | SPF     | RC   | <i>bmal1</i> | 0.40                     | 0.677   | 0.054  | 2.13                                | 0.139   | 0.416 |
|       | SPF     | HF   | <i>bmal1</i> | 2.65                     | 0.103   | 0.261  | 1.19                                | 0.363   | 0.269 |
|       | GF      | RC   | <i>bmal1</i> | 2.75                     | 0.098   | 0.282  | 1.99                                | 0.161   | 0.398 |
|       | GF      | HF   | <i>bmal1</i> | 3.97                     | 0.041   | 0.346  | 1.94                                | 0.164   | 0.374 |
|       | SPF     | RC   | <i>clock</i> | 2.01                     | 0.171   | 0.223  | 1.64                                | 0.229   | 0.353 |
|       | SPF     | HF   | <i>clock</i> | 1.29                     | 0.305   | 0.147  | 0.62                                | 0.655   | 0.161 |
|       | GF      | RC   | <i>clock</i> | 1.10                     | 0.361   | 0.136  | 0.65                                | 0.641   | 0.177 |
|       | GF      | HF   | <i>clock</i> | 1.65                     | 0.229   | 0.180  | 2.89                                | 0.065   | 0.470 |
|       | SPF     | RC   | <i>per1</i>  | 0.91                     | 0.424   | 0.116  | 2.20                                | 0.130   | 0.423 |
|       | SPF     | HF   | <i>per1</i>  | 1.32                     | 0.298   | 0.150  | 0.58                                | 0.680   | 0.152 |
|       | GF      | RC   | <i>per1</i>  | 0.00                     | 0.997   | 0.000  | 0.31                                | 0.866   | 0.094 |
|       | GF      | HF   | <i>per1</i>  | 2.95                     | 0.083   | 0.282  | 2.75                                | 0.074   | 0.458 |
|       | SPF     | RC   | <i>per2</i>  | 1.55                     | 0.249   | 0.181  | 1.42                                | 0.284   | 0.322 |
|       | SPF     | HF   | <i>per2</i>  | 0.89                     | 0.430   | 0.106  | 0.10                                | 0.446   | 0.235 |
|       | GF      | RC   | <i>per2</i>  | 1.07                     | 0.370   | 0.133  | 1.15                                | 0.382   | 0.278 |
|       | GF      | HF   | <i>per2</i>  | 1.12                     | 0.352   | 0.130  | 0.80                                | 0.546   | 0.198 |
|       | SPF     | RC   | <i>per3</i>  | 3.73                     | 0.050   | 0.348  | 2.08                                | 0.146   | 0.410 |
|       | SPF     | HF   | <i>per3</i>  | 1.25                     | 0.316   | 0.143  | 2.58                                | 0.087   | 0.443 |
|       | GF      | RC   | <i>per3</i>  | 0.12                     | 0.890   | 0.017  | 0.09                                | 0.983   | 0.030 |
|       | GF      | HF   | <i>per3</i>  | 5.61                     | 0.015   | 0.428  | 3.13                                | 0.052   | 0.490 |
|       | SPF     | RC   | <i>cry1</i>  | 1.20                     | 0.331   | 0.146  | 1.97                                | 0.163   | 0.397 |
|       | SPF     | HF   | <i>cry1</i>  | 0.32                     | 0.733   | 0.041  | 0.15                                | 0.960   | 0.044 |
|       | GF      | RC   | <i>cry1</i>  | 0.88                     | 0.437   | 0.112  | 0.44                                | 0.775   | 0.129 |
|       | GF      | HF   | <i>cry1</i>  | 9.35                     | 0.002   | 0.555  | 5.38                                | 0.009   | 0.623 |
|       | SPF     | RC   | <i>cry2</i>  | 1.61                     | 0.238   | 0.187  | 1.94                                | 0.169   | 0.393 |
|       | SPF     | HF   | <i>cry2</i>  | 0.53                     | 0.597   | 0.066  | 0.25                                | 0.907   | 0.070 |
|       | GF      | RC   | <i>cry2</i>  | 0.57                     | 0.576   | 0.076  | 0.69                                | 0.614   | 0.187 |
|       | GF      | HF   | <i>cry2</i>  | 2.29                     | 0.135   | 0.234  | 4.31                                | 0.020   | 0.570 |
| Liver | SPF     | RC   | <i>bmal1</i> | 61.55                    | 0.000   | 0.897  | 46.38                               | 0.000   | 0.939 |
|       | SPF     | HF   | <i>bmal1</i> | 25.92                    | 0.000   | 0.776  | 14.97                               | 0.000   | 0.822 |
|       | GF      | RC   | <i>bmal1</i> | 72.53                    | 0.000   | 0.912  | 46.87                               | 0.000   | 0.940 |
|       | GF      | HF   | <i>bmal1</i> | 2.46                     | 0.119   | 0.247  | 1.27                                | 0.336   | 0.281 |
|       | SPF     | RC   | <i>clock</i> | 23.77                    | 0.000   | 0.773  | 10.81                               | 0.001   | 0.783 |
|       | SPF     | HF   | <i>clock</i> | 19.85                    | 0.000   | 0.723  | 9.71                                | 0.001   | 0.749 |
|       | GF      | RC   | <i>clock</i> | 20.34                    | 0.000   | 0.744  | 11.41                               | 0.000   | 0.792 |
|       | GF      | HF   | <i>clock</i> | 3.88                     | 0.044   | 0.341  | 2.62                                | 0.084   | 0.446 |
|       | SPF     | RC   | <i>per1</i>  | 1.09                     | 0.365   | 0.134  | 2.45                                | 0.103   | 0.449 |
|       | SPF     | HF   | <i>per1</i>  | 0.81                     | 0.464   | 0.097  | 0.51                                | 0.728   | 0.136 |
|       | GF      | RC   | <i>per1</i>  | 7.81                     | 0.005   | 0.527  | 3.55                                | 0.039   | 0.542 |
|       | GF      | HF   | <i>per1</i>  | 9.14                     | 0.003   | 0.549  | 9.44                                | 0.001   | 0.744 |
|       | SPF     | RC   | <i>per2</i>  | 4.50                     | 0.031   | 0.391  | 2.90                                | 0.068   | 0.491 |
|       | SPF     | HF   | <i>per2</i>  | 4.36                     | 0.032   | 0.368  | 2.75                                | 0.074   | 0.459 |
|       | GF      | RC   | <i>per2</i>  | 19.61                    | 0.000   | 0.737  | 9.75                                | 0.001   | 0.765 |
|       | GF      | HF   | <i>per2</i>  | 2.86                     | 0.091   | 0.290  | 3.38                                | 0.045   | 0.529 |
|       | SPF     | RC   | <i>per3</i>  | 13.21                    | 0.001   | 0.670  | 8.80                                | 0.002   | 0.762 |
|       | SPF     | HF   | <i>per3</i>  | 6.99                     | 0.007   | 0.483  | 3.58                                | 0.035   | 0.524 |
|       | GF      | RC   | <i>per3</i>  | 25.17                    | 0.000   | 0.782  | 20.57                               | 0.000   | 0.873 |
|       | GF      | HF   | <i>per3</i>  | 1.35                     | 0.290   | 0.153  | 5.18                                | 0.010   | 0.614 |
|       | SPF     | RC   | <i>cry1</i>  | 45.53                    | 0.000   | 0.867  | 20.76                               | 0.000   | 0.874 |
|       | SPF     | HF   | <i>cry1</i>  | 38.46                    | 0.000   | 0.846  | 25.59                               | 0.000   | 0.895 |
|       | GF      | RC   | <i>cry1</i>  | 66.15                    | 0.000   | 0.904  | 29.20                               | 0.000   | 0.907 |
|       | GF      | HF   | <i>cry1</i>  | 2.75                     | 0.096   | 0.2685 | 1.40                                | 0.287   | 0.301 |
|       | SPF     | RC   | <i>cry2</i>  | 0.30                     | 0.744   | 0.044  | 0.37                                | 0.822   | 0.120 |
|       | SPF     | HF   | <i>cry2</i>  | 2.89                     | 0.093   | 0.271  | 2.40                                | 0.104   | 0.425 |
|       | GF      | RC   | <i>cry2</i>  | 19.45                    | 0.000   | 0.735  | 12.17                               | 0.000   | 0.802 |
|       | GF      | HF   | <i>cry2</i>  | 2.96                     | 0.083   | 0.283  | 4.26                                | 0.020   | 0.567 |

Blue p-value indicates  $p < 0.1$ ; Red p-value indicates  $p < 0.05$

**Table S3. Empirical JTK\_Cycle cecal and fecal OTU rhythmicity, Related to Figure 2**

| Diet                                                                           | Taxonomy                                                                                   | OTU ID                                                         | Phase   | Asymmetry | Mean   | Std Dev | Max   | Min | Max Amp | FC     | IQR FC | Tau  | P-value  | empP   | BH1  |      |
|--------------------------------------------------------------------------------|--------------------------------------------------------------------------------------------|----------------------------------------------------------------|---------|-----------|--------|---------|-------|-----|---------|--------|--------|------|----------|--------|------|------|
| RC - fecal                                                                     | p_Firmicutes; c_Clostridia; o_Clostridiales                                                | 175307                                                         | 8       | 4         | 7.67   | 5.49    | 25    | 1   | 24      | 25     | 2.25   | 0.46 | 0.0006   | 0.02   | 0.77 |      |
|                                                                                | p_Firmicutes; c_Clostridia; o_Clostridiales; f_Ruminococcaceae; g_Oscillospira             | 174770                                                         | 2       | 12        | 422.08 | 400.06  | 1463  | 28  | 1435    | 52.25  | 4.90   | 0.46 | 0.0007   | 0.02   | 0.77 |      |
|                                                                                | p_Bacteroidetes; c_Bacteroidia; o_Bacteroidales; f_S24-7                                   | 190673                                                         | 14      | 12        | 78.38  | 31.01   | 180   | 34  | 146     | 5.29   | 1.5    | 0.44 | 0.0010   | 0.03   | 0.77 |      |
|                                                                                | p_Firmicutes; c_Clostridia; o_Clostridiales                                                | 199215                                                         | 2       | 20        | 269.46 | 217.94  | 964   | 34  | 930     | 28.35  | 3.31   | 0.42 | 0.0018   | 0.04   | 0.77 |      |
|                                                                                | p_Bacteroidetes; c_Bacteroidia; o_Bacteroidales; f_S24-7                                   | 177414                                                         | 8       | 20        | 557.63 | 208.16  | 1130  | 157 | 973     | 7.20   | 1.67   | 0.42 | 0.0018   | 0.04   | 0.77 |      |
|                                                                                | p_Firmicutes; c_Clostridia; o_Clostridiales                                                | 196709                                                         | 2       | 12        | 899.25 | 696.31  | 3002  | 122 | 2880    | 24.61  | 3.08   | 0.41 | 0.0021   | 0.05   | 0.77 |      |
|                                                                                | p_Firmicutes; c_Clostridia; o_Clostridiales; f_Ruminococcaceae; g_Oscillospira             | 321484                                                         | 8       | 4         | 29.25  | 21.22   | 75    | 0   | 75      | -10000 | 3.14   | 0.41 | 0.0025   | 0.05   | 0.77 |      |
|                                                                                | p_Bacteroidetes; c_Bacteroidia; o_Bacteroidales; f_S24-7                                   | 182361                                                         | 14      | 12        | 266.54 | 181.92  | 822   | 72  | 750     | 11.42  | 2.32   | 0.38 | 0.0041   | 0.07   | 0.81 |      |
|                                                                                | p_Bacteroidetes; c_Bacteroidia; o_Bacteroidales; f_S24-7                                   | 186028                                                         | 8       | 20        | 647.54 | 259.47  | 1268  | 250 | 1018    | 5.10   | 1.43   | 0.38 | 0.0048   | 0.08   | 0.81 |      |
|                                                                                | p_Bacteroidetes; c_Bacteroidia; o_Bacteroidales; f_S24-7                                   | 197623                                                         | 14      | 20        | 365.79 | 192.98  | 799   | 129 | 670     | 6.19   | 2.71   | 0.37 | 0.0056   | 0.09   | 0.81 |      |
|                                                                                | p_Firmicutes; c_Clostridia; o_Clostridiales; f_Lachnospiraceae; g_[Ruminococcus]; s_gnavus | 4390754                                                        | 2       | 4         | 8.63   | 7.42    | 30    | 2   | 28      | 15     | 2.75   | 0.37 | 0.0065   | 0.10   | 0.81 |      |
|                                                                                | p_Firmicutes; c_Clostridia; o_Clostridiales; f_Lachnospiraceae                             | 173939                                                         | 2       | 20        | 284.79 | 539.08  | 2579  | 4   | 2575    | 644.75 | 7.15   | 0.36 | 0.0065   | 0.10   | 0.81 |      |
| HF - fecal                                                                     | p_Firmicutes; c_Clostridia; o_Clostridiales                                                | 273504                                                         | 2       | 20        | 1      | 0.71    | 2     | 0   | 2       | -10000 | 2      | 0.46 | 0.0007   | 0.02   | 1.00 |      |
|                                                                                | p_Firmicutes; c_Clostridia; o_Clostridiales                                                | 177574                                                         | 20      | 20        | 0.71   | 0.98    | 3     | 0   | 3       | -10000 | NA     | 0.44 | 0.0010   | 0.02   | 1.00 |      |
|                                                                                | p_Firmicutes; c_Clostridia; o_Clostridiales                                                | 175901                                                         | 20      | 4         | 0.67   | 0.94    | 4     | 0   | 4       | -10000 | NA     | 0.39 | 0.0035   | 0.06   | 1.00 |      |
|                                                                                | p_Firmicutes; c_Clostridia; o_Clostridiales; f_Clostridiaceae                              | 268733                                                         | 8       | 20        | 47.88  | 58.421  | 216   | 1   | 215     | 216    | 19.8   | 0.37 | 0.0056   | 0.09   | 1.00 |      |
|                                                                                | p_Firmicutes; c_Bacilli; o_Lactobacillales; f_Straetococcaceae; g_Lactococcus              | 1100972                                                        | 8       | 20        | 3934   | 2297.83 | 11353 | 720 | 10633   | 15.77  | 2.31   | 0.37 | 0.0056   | 0.09   | 1.00 |      |
|                                                                                | p_Firmicutes; c_Clostridia; o_Clostridiales; f_Ruminococcaceae; g_Ruminococcus             | 261365                                                         | 18      | 6         | 1.65   | 1.61    | 4     | 0   | 4       | -10000 | NA     | 0.66 | 6.38E-05 | 0.004  | 0.18 |      |
| RC - cecum                                                                     | p_Firmicutes; c_Clostridia; o_Clostridiales; f_Ruminococcaceae; g_Oscillospira             | 178959                                                         | 16      | 6         | 17.94  | 28.18   | 125   | 0   | 125     | -10000 | 4.05   | 0.64 | 9.74E-05 | 0.005  | 0.18 |      |
|                                                                                | p_Firmicutes; c_Clostridia; o_Clostridiales; f_Lachnospiraceae                             | 2374993                                                        | 16      | 6         | 50.41  | 31.94   | 115   | 0   | 115     | -10000 | 2.14   | 0.60 | 0.0002   | 0.01   | 0.18 |      |
|                                                                                | p_Firmicutes; c_Clostridia; o_Clostridiales                                                | 267411                                                         | 8       | 22        | 7.12   | 8.57    | 30    | 0   | 30      | -10000 | 5.63   | 0.60 | 0.0002   | 0.01   | 0.18 |      |
|                                                                                | p_Firmicutes; c_Clostridia; o_Clostridiales; f_Lachnospiraceae                             | 4440624                                                        | 10      | 2         | 29.88  | 116.78  | 497   | 0   | 497     | -10000 | NA     | 0.59 | 0.0003   | 0.02   | 0.18 |      |
|                                                                                | p_Firmicutes; c_Clostridia; o_Clostridiales; f_Ruminococcaceae                             | 258550                                                         | 18      | 20        | 4.35   | 4.41    | 18    | 0   | 18      | -10000 | 6      | 0.59 | 0.0003   | 0.02   | 0.18 |      |
|                                                                                | p_Firmicutes; c_Bacilli; o_Lactobacillales; f_Lactobacillaceae; g_Lactobacillus            | 259993                                                         | 2       | 8         | 3.18   | 2.79    | 7     | 0   | 7       | -10000 | 24     | 0.58 | 0.0005   | 0.02   | 0.21 |      |
|                                                                                | p_Firmicutes; c_Clostridia; o_Clostridiales; f_Lachnospiraceae                             | 306066                                                         | 16      | 4         | 60.59  | 38.10   | 150   | 0   | 150     | -10000 | 2.66   | 0.54 | 0.0009   | 0.03   | 0.32 |      |
|                                                                                | p_Firmicutes; c_Clostridia; o_Clostridiales                                                | 191811                                                         | 10      | 20        | 0.24   | 0.55    | 2     | 0   | 2       | -10000 | 0      | 0.51 | 0.0017   | 0.06   | 0.41 |      |
|                                                                                | p_Firmicutes; c_Clostridia; o_Clostridiales                                                | 176691                                                         | 12      | 22        | 204.65 | 215.47  | 743   | 0   | 743     | -10000 | 11.81  | 0.52 | 0.0017   | 0.06   | 0.41 |      |
|                                                                                | p_Firmicutes; c_Clostridia; o_Clostridiales                                                | 189585                                                         | 14      | 2         | 4.18   | 7.56    | 32    | 0   | 32      | -10000 | 2.75   | 0.50 | 0.0023   | 0.07   | 0.41 |      |
|                                                                                | p_Firmicutes; c_Clostridia; o_Clostridiales                                                | 185177                                                         | 12      | 14        | 0.24   | 0.64    | 2     | 0   | 2       | -10000 | 0      | 0.48 | 0.0030   | 0.09   | 0.41 |      |
|                                                                                | p_Firmicutes; c_Clostridia; o_Clostridiales                                                | 262527                                                         | 16      | 6         | 13.29  | 33.63   | 147   | 0   | 147     | -10000 | 5.17   | 0.48 | 0.0030   | 0.09   | 0.41 |      |
|                                                                                | p_Firmicutes; c_Clostridia; o_Clostridiales; f_Lachnospiraceae                             | 134065                                                         | 8       | 22        | 40     | 147.11  | 628   | 0   | 628     | -10000 | NA     | 0.49 | 0.0030   | 0.09   | 0.41 |      |
|                                                                                | p_Firmicutes; c_Clostridia; o_Clostridiales; f_Clostridiaceae                              | 261590                                                         | 6       | 20        | 2      | 2.11    | 8     | 0   | 8       | -10000 | 2      | 0.49 | 0.0030   | 0.09   | 0.41 |      |
|                                                                                | p_Firmicutes; c_Clostridia; o_Clostridiales; f_Ruminococcaceae; g_Ruminococcus             | 267042                                                         | 16      | 12        | 46.29  | 25.42   | 117   | 0   | 117     | -10000 | 1.67   | 0.48 | 0.0030   | 0.09   | 0.41 |      |
|                                                                                | HF - cecum                                                                                 | p_Firmicutes; c_Clostridia; o_Clostridiales                    | 4418586 | 12        | 2      | 0.38    | 0.70  | 2   | 0       | 2      | -10000 | NA   | 0.60     | 0.0004 | 0.02 | 0.85 |
|                                                                                |                                                                                            | p_Firmicutes; c_Clostridia; o_Clostridiales                    | 259820  | 12        | 14     | 2       | 2.09  | 7   | 0       | 7      | -10000 | NA   | 0.58     | 0.0006 | 0.02 | 0.85 |
|                                                                                |                                                                                            | p_Firmicutes; c_Clostridia; o_Clostridiales; f_Ruminococcaceae | 263272  | 12        | 20     | 76.31   | 34.08 | 120 | 21      | 99     | 5.71   | 2.28 | 0.55     | 0.0012 | 0.04 | 0.85 |
| p_Firmicutes; c_Clostridia; o_Clostridiales; f_Ruminococcaceae; g_Oscillospira |                                                                                            | 167034                                                         | 12      | 22        | 85.13  | 33.38   | 140   | 30  | 110     | 4.67   | 2.04   | 0.54 | 0.0017   | 0.05   | 0.85 |      |
| p_Firmicutes; c_Clostridia; o_Clostridiales                                    |                                                                                            | 174320                                                         | 14      | 2         | 0.63   | 0.86    | 2     | 0   | 2       | -10000 | NA     | 0.52 | 0.0023   | 0.09   | 0.85 |      |
| p_Firmicutes; c_Clostridia; o_Clostridiales; f_Ruminococcaceae                 |                                                                                            | 265793                                                         | 12      | 18        | 145.69 | 59.25   | 263   | 14  | 249     | 18.79  | 1.71   | 0.51 | 0.0023   | 0.09   | 0.85 |      |
| p_Firmicutes; c_Clostridia; o_Clostridiales; f_Ruminococcaceae                 |                                                                                            | 180535                                                         | 20      | 22        | 80.88  | 35.76   | 148   | 26  | 122     | 5.69   | 2      | 0.51 | 0.0023   | 0.09   | 0.85 |      |

**Table S4. Empirical JTK\_Cycle Biolog™ substrate and sensitivity chemical rhythmicity, related to Figure 3**

| Diet                          | Substrate <sup>a</sup> | Waveform        | Phase                          | Asymmetry        | Mean        | Std Dev                     | Max        | Min        | Max Amp                      | FC        | IQR FC        | Tau                          | P-value        | empP        | BH1                 |  |  |
|-------------------------------|------------------------|-----------------|--------------------------------|------------------|-------------|-----------------------------|------------|------------|------------------------------|-----------|---------------|------------------------------|----------------|-------------|---------------------|--|--|
| RC                            | GlcLPrln               | cosine          | 20                             | 4                | 0.56        | 0.25                        | 0.84       | 0.05       | 0.78                         | 16.42     | 1.50          | 0.68                         | 4.78E-07       | 3.95E-05    | 0.002               |  |  |
|                               | LAlanine               | cosine          | 20                             | 4                | 0.54        | 0.24                        | 0.78       | 0.05       | 0.73                         | 15.60     | 1.52          | 0.66                         | 9.83E-07       | 7.80E-05    | 0.002               |  |  |
|                               | FormcAc                | cosine          | 20                             | 4                | 0.63        | 0.29                        | 0.83       | 0.08       | 0.75                         | 10.40     | 1.11          | 0.66                         | 9.83E-07       | 7.80E-05    | 0.002               |  |  |
|                               | aHydBtAc               | cosine          | 20                             | 4                | 0.65        | 0.23                        | 0.82       | 0.08       | 0.73                         | 9.66      | 1.15          | 0.65                         | 1.39E-06       | 0.0001      | 0.002               |  |  |
|                               | ActctcAc               | cosine          | 14                             | 12               | 0.74        | 0.25                        | 0.91       | 0.11       | 0.80                         | 8.50      | 1.07          | 0.64                         | 1.95E-06       | 0.0001      | 0.002               |  |  |
|                               | BrmScAc                | cosine          | 20                             | 4                | 0.57        | 0.17                        | 0.69       | 0.06       | 0.63                         | 12.17     | 1.10          | 0.62                         | 7.02E-06       | 0.0004      | 0.004               |  |  |
|                               | AceticAc               | cosine          | 14                             | 12               | 0.78        | 0.19                        | 0.90       | 0.09       | 0.81                         | 10.06     | 1.06          | 0.62                         | 7.02E-06       | 0.0004      | 0.004               |  |  |
|                               | aKBrAc                 | cosine          | 20                             | 4                | 0.68        | 0.15                        | 0.78       | 0.09       | 0.70                         | 8.92      | 1.11          | 0.60                         | 1.28E-05       | 0.0006      | 0.006               |  |  |
|                               | D-Rfms                 | cosine          | 20                             | 4                | 0.70        | 0.22                        | 0.84       | 0.08       | 0.76                         | 10.61     | 1.11          | 0.60                         | 1.28E-05       | 0.0006      | 0.006               |  |  |
|                               | DAsprAc                | cosine          | 20                             | 4                | 0.60        | 0.26                        | 0.86       | 0.07       | 0.80                         | 12.78     | 1.55          | 0.57                         | 3.90E-05       | 0.0018      | 0.012               |  |  |
|                               | Inosine                | cosine          | 20                             | 4                | 0.58        | 0.25                        | 0.80       | 0.05       | 0.75                         | 15.52     | 1.25          | 0.56                         | 3.90E-05       | 0.0018      | 0.012               |  |  |
|                               | LLtcAc                 | cosine          | 20                             | 4                | 0.60        | 0.22                        | 0.78       | 0.05       | 0.73                         | 14.35     | 1.37          | 0.56                         | 5.09E-05       | 0.0023      | 0.014               |  |  |
|                               | DMalcAc                | cosine          | 20                             | 4                | 0.66        | 0.21                        | 0.81       | 0.05       | 0.75                         | 14.87     | 1.13          | 0.55                         | 5.09E-05       | 0.0023      | 0.014               |  |  |
|                               | QuincAc                | cosine          | 20                             | 4                | 0.58        | 0.21                        | 0.77       | 0.06       | 0.71                         | 12.73     | 1.47          | 0.52                         | 0.0002         | 0.0058      | 0.030               |  |  |
|                               | PrpncAc                | cosine          | 14                             | 12               | 0.74        | 0.25                        | 0.96       | 0.08       | 0.87                         | 11.40     | 1.08          | 0.52                         | 0.0002         | 0.0058      | 0.029               |  |  |
|                               | D-Mbios                | cosine          | 14                             | 12               | 0.68        | 0.18                        | 0.82       | 0.10       | 0.72                         | 8.22      | 1.18          | 0.51                         | 0.0002         | 0.0072      | 0.033               |  |  |
|                               | D-Fucose               | cosine          | 20                             | 4                | 0.69        | 0.18                        | 0.82       | 0.10       | 0.72                         | 8.40      | 1.13          | 0.51                         | 0.0002         | 0.0072      | 0.033               |  |  |
|                               | Pectin                 | cosine          | 20                             | 4                | 0.57        | 0.19                        | 0.74       | 0.06       | 0.68                         | 12.32     | 1.23          | 0.49                         | 0.0004         | 0.011       | 0.047               |  |  |
|                               | DSaccAc                | cosine          | 20                             | 4                | 0.62        | 0.24                        | 0.89       | 0.06       | 0.84                         | 15.61     | 1.22          | 0.48                         | 0.0004         | 0.013       | 0.048               |  |  |
|                               | L-Rhmse                | cosine          | 20                             | 4                | 0.69        | 0.15                        | 0.80       | 0.10       | 0.70                         | 8.15      | 1.10          | 0.48                         | 0.0004         | 0.013       | 0.048               |  |  |
|                               | gAmButAc               | cosine          | 20                             | 4                | 0.67        | 0.23                        | 0.81       | 0.08       | 0.73                         | 10.28     | 1.08          | 0.48                         | 0.0005         | 0.013       | 0.048               |  |  |
|                               | D-Turns                | cosine          | 20                             | 4                | 0.65        | 0.22                        | 0.82       | 0.08       | 0.74                         | 10.61     | 1.11          | 0.47                         | 0.0007         | 0.016       | 0.056               |  |  |
|                               | LAsprAc                | cosine          | 20                             | 4                | 0.63        | 0.21                        | 0.81       | 0.05       | 0.76                         | 14.83     | 1.15          | 0.46                         | 0.0008         | 0.019       | 0.061               |  |  |
|                               | Stchys                 | cosine          | 20                             | 4                | 0.64        | 0.21                        | 0.83       | 0.08       | 0.75                         | 10.47     | 1.29          | 0.46                         | 0.0008         | 0.019       | 0.061               |  |  |
| Glucnmd                       | cosine                 | 20              | 4                              | 0.65             | 0.15        | 0.79                        | 0.22       | 0.57       | 3.56                         | 1.14      | 0.46          | 0.0010                       | 0.023          | 0.063       |                     |  |  |
| L-Fucose                      | cosine                 | 20              | 4                              | 0.71             | 0.14        | 0.80                        | 0.13       | 0.68       | 6.40                         | 1.11      | 0.46          | 0.0010                       | 0.023          | 0.063       |                     |  |  |
| bHDLBAc                       | cosine                 | 20              | 4                              | 0.72             | 0.17        | 0.83                        | 0.08       | 0.75       | 10.43                        | 1.08      | 0.46          | 0.0010                       | 0.023          | 0.063       |                     |  |  |
| a-D-Lcts                      | cosine                 | 20              | 4                              | 0.68             | 0.19        | 0.85                        | 0.08       | 0.77       | 11.17                        | 1.13      | 0.44          | 0.0015                       | 0.033          | 0.080       |                     |  |  |
| LHstine                       | cosine                 | 20              | 4                              | 0.67             | 0.20        | 0.85                        | 0.05       | 0.80       | 15.66                        | 1.35      | 0.44          | 0.0015                       | 0.033          | 0.080       |                     |  |  |
| CitrAc                        | cosine                 | 14              | 12                             | 0.67             | 0.14        | 0.82                        | 0.05       | 0.77       | 15.99                        | 1.07      | 0.43          | 0.0018                       | 0.039          | 0.092       |                     |  |  |
| HF                            | 3MthlGlc               | cosine          | 20                             | 4                | 0.71        | 0.17                        | 0.91       | 0.07       | 0.84                         | 13.27     | 1.06          | 0.52                         | 0.0002         | 0.007       | 0.32                |  |  |
|                               | DGlcAc                 | cosine          | 20                             | 4                | 0.73        | 0.16                        | 0.87       | 0.09       | 0.77                         | 9.37      | 1.10          | 0.50                         | 0.0003         | 0.011       | 0.32                |  |  |
|                               | MthylPyr               | cosine          | 20                             | 4                | 0.62        | 0.11                        | 0.79       | 0.23       | 0.56                         | 3.38      | 1.15          | 0.49                         | 0.0004         | 0.013       | 0.32                |  |  |
|                               | QuincAc                | cosine          | 14                             | 12               | 0.64        | 0.20                        | 0.80       | 0.06       | 0.74                         | 12.80     | 1.08          | 0.45                         | 0.0016         | 0.035       | 0.43                |  |  |
|                               | D-Mbios                | cosine          | 20                             | 4                | 0.74        | 0.16                        | 0.99       | 0.09       | 0.89                         | 10.61     | 1.10          | 0.44                         | 0.0020         | 0.042       | 0.43                |  |  |
|                               | LArginine              | cosine          | 8                              | 20               | 0.74        | 0.09                        | 0.84       | 0.51       | 0.33                         | 1.64      | 1.10          | 0.44                         | 0.0020         | 0.042       | 0.43                |  |  |
| bHDLBAc                       | cosine                 | 20              | 4                              | 0.72             | 0.21        | 0.88                        | 0.08       | 0.80       | 10.85                        | 1.06      | 0.43          | 0.0024                       | 0.049          | 0.43        |                     |  |  |
|                               | <b>Chemical</b>        | <b>Waveform</b> | <b>Phase</b>                   | <b>Asymmetry</b> | <b>Mean</b> | <b>Std Dev</b>              | <b>Max</b> | <b>Min</b> | <b>Max Amp</b>               | <b>FC</b> | <b>IQR FC</b> | <b>Tau</b>                   | <b>P-value</b> | <b>empP</b> | <b>BH1</b>          |  |  |
| RC                            | 8% NaCl                | cosine          | 20                             | 4                | 0.53        | 0.23                        | 0.80       | 0.12       | 0.68                         | 6.71      | 1.67          | 0.66                         | 9.83E-07       | 7.80E-05    | 0.002               |  |  |
|                               | SdmBtyrt               | cosine          | 20                             | 4                | 0.64        | 0.23                        | 0.90       | 0.17       | 0.73                         | 5.22      | 1.56          | 0.59                         | 1.70E-05       | 0.0008      | 0.007               |  |  |
|                               | RfmycnSV               | cosine          | 20                             | 4                | 0.49        | 0.20                        | 0.93       | 0.14       | 0.79                         | 6.85      | 1.57          | 0.58                         | 2.26E-05       | 0.0011      | 0.009               |  |  |
|                               | 4% NaCl                | cosine          | 8                              | 20               | 0.59        | 0.16                        | 0.76       | 0.13       | 0.63                         | 5.88      | 1.22          | 0.48                         | 0.0004         | 0.013       | 0.049               |  |  |
|                               | pH_5                   | cosine          | 20                             | 4                | 0.26        | 0.10                        | 0.55       | 0.04       | 0.51                         | 12.71     | 1.71          | 0.46                         | 0.0008         | 0.019       | 0.061               |  |  |
|                               | Mincycln               | cosine          | 20                             | 1                | 0.17        | 0.01                        | 0.20       | 0.15       | 0.048                        | 1.31      | 1.13          | 0.46                         | 0.0010         | 0.023       | 0.062               |  |  |
|                               | SdmBromt               | cosine          | 8                              | 12               | 0.29        | 0.16                        | 0.62       | 0.10       | 0.52                         | 6.00      | 3.70          | 0.45                         | 0.0010         | 0.023       | 0.063               |  |  |
|                               | D-Serine               | cosine          | 20                             | 4                | 0.51        | 0.25                        | 0.81       | 0.07       | 0.75                         | 12.02     | 2.54          | 0.45                         | 0.0012         | 0.028       | 0.073               |  |  |
|                               | TrzmBlu                | cosine          | 20                             | 12               | 0.27        | 0.08                        | 0.60       | 0.20       | 0.40                         | 2.99      | 1.18          | 0.44                         | 0.0015         | 0.033       | 0.080               |  |  |
|                               | SdmBromt               | cosine          | 8                              | 12               | 0.27        | 0.17                        | 0.55       | 0.10       | 0.45                         | 5.46      | 4.07          | 0.52                         | 0.0002         | 0.0070      | 0.32                |  |  |
| LhmChlr                       | cosine                 | 8               | 20                             | 0.11             | 0.03        | 0.24                        | 0.09       | 0.16       | 2.80                         | 1.24      | 0.43          | 0.0024                       | 0.049          | 0.431       |                     |  |  |
| <b>Substrates<sup>b</sup></b> |                        |                 |                                |                  |             |                             |            |            |                              |           |               | <b>Sensitivity chemicals</b> |                |             |                     |  |  |
| D-Raffinose                   |                        |                 | D-Melibiose                    |                  |             | D-Salicin                   |            |            | L-Fucose                     |           |               | 1% NaCl                      |                |             | Tetrazolium Violet  |  |  |
| alpha-D-Glucose               |                        |                 | D-Fructose                     |                  |             | 3-Methyl Glucose            |            |            | D-Fructose-6-PO <sub>4</sub> |           |               | Niaproof 4                   |                |             | 1% Sodium Lactate   |  |  |
| D-Sorbitol                    |                        |                 | D-Arabitol                     |                  |             | Glycerol                    |            |            | L-Histidine                  |           |               | Troleandomycin               |                |             | Tetrazolium Blue    |  |  |
| Gelatin                       |                        |                 | L-Alanine                      |                  |             | L-Aspartic Acid             |            |            | Mucic Acid                   |           |               | Lincomycin                   |                |             | Potassium Tellurite |  |  |
| N-Acetyl-D-Galactosamine      |                        |                 | L-Galactonic Acid Lactone      |                  |             | D-Gluconic Acid             |            |            | D-Malic Acid                 |           |               | Vancomycin                   |                |             | Sodium Bromate      |  |  |
| p-HydroxyPhenylatic Acid      |                        |                 | D-Lactic Acid Methyl Ester     |                  |             | alpha-Keto-Butyric Acid     |            |            | Propionic Acid               |           |               | Nalidixic Acid               |                |             | Tween-40            |  |  |
| Tween 40                      |                        |                 | Alpha-HydroxyButyric Acid      |                  |             | Gentiobiose                 |            |            | D-Turanose                   |           |               | Aztreonam                    |                |             |                     |  |  |
| N-Acetyl-B-D-Mannosamine      |                        |                 | D-Rehalose                     |                  |             | N-Acetyl-D-Glucosamine      |            |            | Pectin                       |           |               | pH 6                         |                |             |                     |  |  |
| alpha-D-Lactose               |                        |                 | Beta-Methyl-D-Glucoside        |                  |             | D-Fucose                    |            |            | L-Rhamnose                   |           |               | 4% NaCl                      |                |             |                     |  |  |
| D-Mannose                     |                        |                 | D-Galactose                    |                  |             | D-Glucose-6-PO <sub>4</sub> |            |            | D-Aspartic Acid              |           |               | Fusidic Acid                 |                |             |                     |  |  |
| D-Mannitol                    |                        |                 | Myo-Inositol                   |                  |             | L-Arginine                  |            |            | L-Pyroglutamic Acid          |           |               | Rifamycin SV                 |                |             |                     |  |  |
| Glycyl-L-Proline              |                        |                 | N-Acetyl Neuraminic Acid       |                  |             | Glucuronamide               |            |            | Quinic Acid                  |           |               | Guanidine HCl                |                |             |                     |  |  |
| D-Galacturonic Acid           |                        |                 | D-Gluconic Acid                |                  |             | alpha-Keto-Glutaric Acid    |            |            | L-Malic Acid                 |           |               | Minocycline                  |                |             |                     |  |  |
| Methyl Pyruvate               |                        |                 | L-Lactic Acid                  |                  |             | Acetoacetic Acid            |            |            | Acetic Acid                  |           |               | Lithium Chloride             |                |             |                     |  |  |
| Gamma-Amino-Butyric Acid      |                        |                 | Beta-Hydroxy-D, L-Butyric Acid |                  |             | Sucrose                     |            |            | Stachyose                    |           |               | Sodium Butyrate              |                |             |                     |  |  |
| D-Maltose                     |                        |                 | D-Cellobiose                   |                  |             | Dextrin                     |            |            | L-Glutamic Acid              |           |               | pH 5                         |                |             |                     |  |  |
| Inosine                       |                        |                 | D-Serine                       |                  |             | L-Serine                    |            |            |                              |           |               | 8% NaCl                      |                |             |                     |  |  |
| D-Saccharic Acid              |                        |                 | Bromo-Succinic Acid            |                  |             | Formic Acid                 |            |            |                              |           |               | D-serine                     |                |             |                     |  |  |

<sup>a</sup>Grey shading indicates unique substrates/chemicals exhibiting significant rhythmicity within dietary treatment in fecal pellets collected via repeat sampling from individual mice over 48 hours ( $n = 3/\text{treatment}$ ). Yellow shading indicates substrates/chemicals that exhibiting significant rhythmicity in both dietary treatments.

<sup>b</sup>List of Biolog GEN III MicroPlate™ substrates and sensitivity chemicals

**Table S5. Microbial metabolite and gene abundance CircWave cosinor statistical output, related to Figure 3 and Figure 4**

|                            | Housing     | Diet         | Measure                  | F-statistic (1 sinewave) | P-value        | R <sup>2</sup>                      | F-statistic (sinewave + 1 harmonic) | P-value        | R <sup>2</sup> |
|----------------------------|-------------|--------------|--------------------------|--------------------------|----------------|-------------------------------------|-------------------------------------|----------------|----------------|
| 24h SCFA Cecal             | SPF         | RC           | Acetate                  | 0.97                     | 0.397          | 0.088                               | 1.67                                | 0.201          | 0.270          |
|                            | SPF         | HF           | Acetate                  | 2.97                     | 0.073          | 0.221                               | 1.83                                | 0.165          | 0.278          |
|                            | SPF         | RC           | Butyrate                 | 3.44                     | 0.052          | 0.256                               | 3.33                                | 0.032          | 0.426          |
|                            | SPF         | HF           | Butyrate                 | 2.10                     | 0.147          | 0.167                               | 1.11                                | 0.385          | 0.189          |
|                            | SPF         | RC           | Propionate               | 2.11                     | 0.158          | 0.232                               | 2.57                                | 0.092          | 0.462          |
|                            | SPF         | HF           | Propionate               | 1.50                     | 0.257          | 0.167                               | 0.90                                | 0.495          | 0.216          |
| 48h SCFA Fecal             | SPF         | RC           | Acetate                  | 0.60                     | 0.557          | 0.054                               | 0.30                                | 0.874          | 0.059          |
|                            | SPF         | HF           | Acetate                  | 0.84                     | 0.447          | 0.074                               | 0.49                                | 0.743          | 0.094          |
|                            | SPF         | RC           | Butyrate                 | 6.33                     | 0.007          | 0.376                               | 5.40                                | 0.004          | 0.532          |
|                            | SPF         | HF           | Butyrate                 | 3.16                     | 0.064          | 0.240                               | 2.73                                | 0.062          | 0.378          |
| 24h H <sub>2</sub> S Cecal | SPF         | RC           | H <sub>2</sub> S         | 9.03                     | 0.003          | 0.546                               | 4.40                                | 0.018          | 0.575          |
|                            | SPF         | HF           | H <sub>2</sub> S         | 0.56                     | 0.583          | 0.070                               | 0.25                                | 0.906          | 0.071          |
| 48h H <sub>2</sub> S Fecal | SPF         | RC           | H <sub>2</sub> S         | 0.78                     | 0.472          | 0.076                               | 0.66                                | 0.627          | 0.135          |
|                            | SPF         | HF           | H <sub>2</sub> S         | 5.14                     | 0.015          | 0.329                               | 2.40                                | 0.086          | 0.335          |
| Microbial DNA              | SPF         | RC           | Ros_Eub                  | 1.33                     | 0.298          | 0.160                               | 1.23                                | 0.353          | 0.291          |
|                            | SPF         | HF           | Ros_Eub                  | 0.49                     | 0.624          | 0.065                               | 0.85                                | 0.519          | 0.222          |
|                            | SPF         | RC           | 16S                      | 7.88                     | 0.006          | 0.548                               | 5.45                                | 0.011          | 0.665          |
|                            | SPF         | HF           | 16S                      | 1.77                     | 0.206          | 0.202                               | 1.18                                | 0.371          | 0.283          |
|                            | SPF         | RC           | dsrAB                    | 2.50                     | 0.115          | 0.250                               | 1.68                                | 0.213          | 0.341          |
|                            | SPF         | HF           | dsrAB                    | 1.94                     | 0.181          | 0.217                               | 2.94                                | 0.066          | 0.495          |
|                            | Treatment   | Gene         | F-statistic (1 sinewave) | P-value                  | R <sup>2</sup> | F-statistic (sinewave + 1 harmonic) | P-value                             | R <sup>2</sup> |                |
| Hepanoids                  | Acetate     | <i>bmal1</i> | 1.08                     | 0.374                    | 0.164          | 0.44                                | 0.776                               | 0.164          |                |
|                            | Acetate     | <i>per2</i>  | 2.36                     | 0.140                    | 0.300          | 0.10                                | 0.473                               | 0.300          |                |
|                            | Butyrate    | <i>bmal1</i> | 6.51                     | 0.014                    | 0.542          | 2.66                                | 0.102                               | 0.542          |                |
|                            | Butyrate    | <i>per2</i>  | 4.74                     | 0.033                    | 0.463          | 1.94                                | 0.188                               | 0.463          |                |
|                            | NaHS        | <i>bmal1</i> | 2.75                     | 0.117                    | 0.379          | 1.07                                | 0.441                               | 0.379          |                |
|                            | NaHS        | <i>per2</i>  | 0.39                     | 0.686                    | 0.080          | 0.15                                | 0.956                               | 0.080          |                |
|                            | NoTrt       | <i>bmal1</i> | 3.50                     | 0.067                    | 0.389          | 1.43                                | 0.299                               | 0.390          |                |
| NoTrt                      | <i>per2</i> | 0.66         | 0.534                    | 0.108                    | 0.27           | 0.889                               | 0.108                               |                |                |

Blue p-value indicates p<0.1; Red p-value indicates p<0.05



## SUPPLEMENTAL EXPERIMENTAL PROCEDURES:

### Host RNA extraction and analysis

Total RNA was extracted from MBH and liver as previously described (Wang et al., 2010). cDNA synthesis was performed using SuperScript II (Invitrogen) and random hexanucleotide primers. Forward and Reverse primers were added to iQSYBR Green PCR Supermix (Bio-rad) to amplify *clock*, *bmal1*, *per1-3*, and *cry1-2*. Real-time quantitative PCR was performed on a Lightcycler 480 System (Roche Applied Science). Gene expression levels were determined using the comparative  $C_T$  method normalizing target mRNA to GAPDH. Forward (F) and reverse (R) primer sequences are as follows: *clock*, F-ACCACAGCAACAGCAACAAC; R-GGCTGCTGAACTGAAGGAAG; *bmal1*, F-CCACCTCAGAGCCATTGATACA; R-GAGCAGGTTTAGTTCCACTTTGTCT; *per1*, F-TGAAGCAAGACCGGGAGA; R-CACACACGCCGTCACATC; *per2*, F-TGTGCGATGATGATTTCGTGA; R-GGTGAAGGTACGTTTGGTTTGC; *per3*, F-AAAAGCACCCACGGATACTGGC; R-GGGACCCTGTAGCTTGTGTC; *cry1*, F-CACTGGTTCCGAAAGGGACTC; R-CTGAAGCAAAAATCGCCACCT; *cry2*, F-CACTGGTTCCGCAAAGGACTA; R-CCACGGGTCGAGGATGTAGA.

### Bacterial gene quantification

*Rosburia butyryl-CoA: acetate CoA-transferase (but)* gene copy number was determined from luminal cecal contents and fecal pellets as previously described (Vital et al., 2013; Louis et al., 2010). Genes were quantified by determining a standard curve for gene copy number by cloning primer sequences into pCR4-TOPO plasmids. Forward (F) and reverse (R) primer sequences are as follows: 16S rRNA, F-TCCTACGGGAGGCAGCAGT; R-GGACTACCAGGGTATCTAATCCTGTT; butyryl-CoA: acetate CoA-transferase G-RosEub (*but*), F-TCAAATCMGGIGACTGGGTWGA; R1-TCGATACCGGACATATGCCAKGAG; R2-TCATAACCGCCCATATGCCATGAG.

### Metagenomic library preparation and sequencing analysis

Metagenomic shotgun libraries were prepared using Illumina's NexteraXT Kit, sequenced on the Illumina MiSeq Platform, and data processed through the MG-RAST pipeline (<http://metagenomics.anl.gov>; Glass and Meyer, 2011). Processed hierarchical SEED annotations were downloaded using the matR package in R v2.15.2 (The R Development Core Team, 2008) and abundance tables were normalized to equivalent sampling depth, and analyzed using QIIME and R v2.15.2. Significant shifts in gene/pathway abundance between time points were assessed using ANOVA (Bonferroni correction for multiple tests;  $\alpha = 0.05$ ) (Caporaso et al., 2010). Heatmap plots were generated using the Matplotlib library (Hunter, 2007) in Python.

## SUPPLEMENTAL REFERENCES:

Glass, E.M., and Meyer, F. (2011). The Metagenomics RAST Server: A Public Resource for the Automatic Phylogenetic and Functional Analysis of Metagenomes. *Handbook of Molecular Microbial Ecology I: Metagenomics and Complementary Approaches* (ed F.J. de Bruijin) John Wiley & Sons Inc, Hoboken NJ, USA pp. 325-331.

Hunter, J.D. (2007). Matplotlib: A 2D graphics environment. *Computing in Science and Engineering* 9, 90-95.

The R Development Core Team. R: A language and environment for statistical computing. R Foundation for Statistical Computing, Vienna, Austria (2008).

Wang, Y., Devkota, S., Musch, M., Jabri, B., Nagler, C., Antonopoulos, D.A., Chervonsky, A., and Chang, E.B. (2010). Regional mucosa-associated microbiota determine physiological expression of TLR2 and TLR4 in murine colon. *PLoS One* 22, e13607.
